# Supplementary material for: One-two-triage: validation and reliability of a novel triage system for low-resource settings
Source: PubMed Central journal article supplement — Emerg Med J. 2016 Jul 27;33(10):709–15. doi: 10.1136/emermed-2015-205430 (PMC5050286; doi:10.1136/emermed-2015-205430), 2016-07-27
Supplement: emermed-2015-205430supp_appendices.pdf [file emermed-2015-205430supp_appendices.pdf]

Appendices:

A. Trauma Triage Algorithm at Stanford University Hospital

Trauma 99 is a major trauma and designates a patient with a life threatening injury or evidence of physiological compromise. This acuity designation is similar to ESI 1 acuity of life threatening illness. Trauma 97, a minor trauma alert, is based on risk of life threatening injury and is similar to an ESI level 2 designation, identifying the patient that would receive “the next bed.” Trauma 95 is a trauma patient that has not been alerted in advance at SUH and gets triaged through the nurses, therefore receiving an ESI level as any other patient presenting to the hospital would

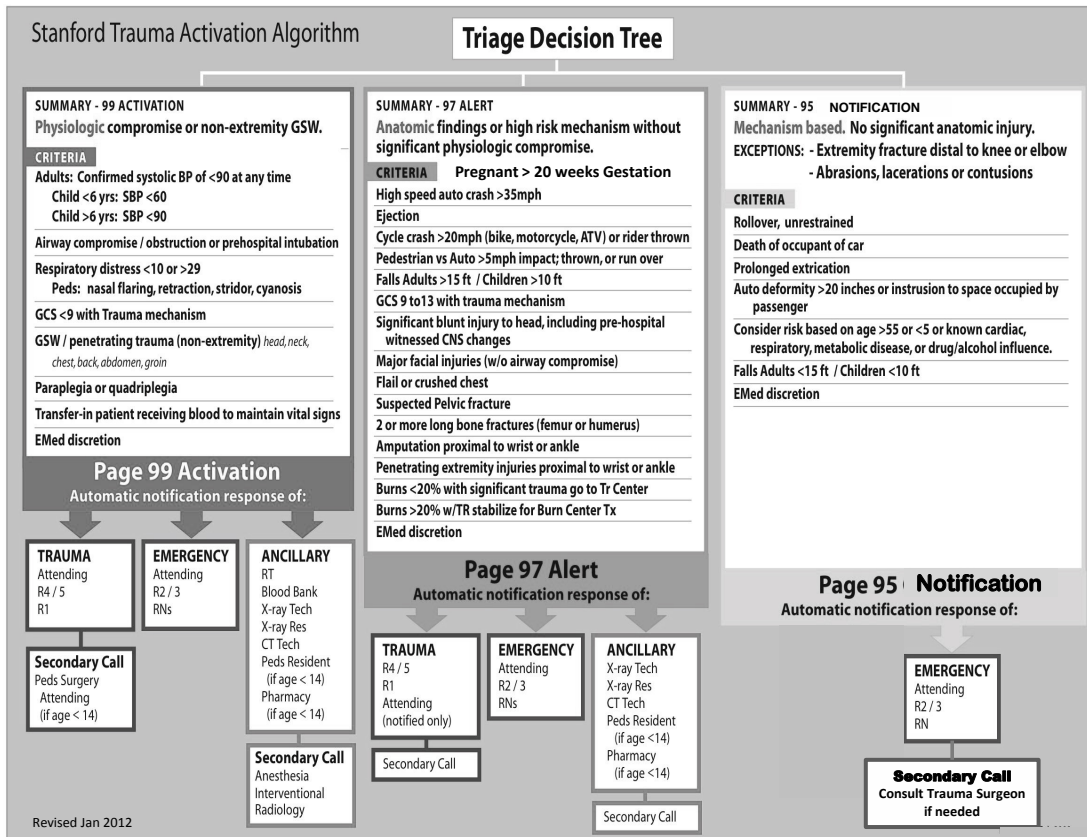

**Triage Decision Tree**

**SUMMARY - 99 ACTIVATION**  
Physiologic compromise or non-extremity GSW.

**CRITERIA**

Adults: Confirmed systolic BP of <90 at any time  
Child <6 yrs: SBP <60  
Child >6 yrs: SBP <90

Airway compromise / obstruction or prehospital intubation

Respiratory distress <10 or >29  
Peds: nasal flaring, retraction, stridor, cyanosis

GCS <9 with Trauma mechanism

GSW / penetrating trauma (non-extremity) head, neck, chest, back, abdomen, groin

Paraplegia or quadriplegia

Transfer-in patient receiving blood to maintain vital signs

EMed discretion

**SUMMARY - 97 ALERT**  
Anatomic findings or high risk mechanism without significant physiologic compromise.

**CRITERIA** Pregnant > 20 weeks Gestation

High speed auto crash >35mph

Ejection

Cycle crash >20mph (bike, motorcycle, ATV) or rider thrown

Pedestrian vs Auto >5mph impact; thrown, or run over

Falls Adults >15 ft / Children >10 ft

GCS 9 to 13 with trauma mechanism

Significant blunt injury to head, including pre-hospital witnessed CNS changes

Major facial injuries (w/o airway compromise)

Flail or crushed chest

Suspected Pelvic fracture

2 or more long bone fractures (femur or humerus)

Amputation proximal to wrist or ankle

Penetrating extremity injuries proximal to wrist or ankle

Burns <20% with significant trauma go to Tr Center

Burns >20% w/TR stabilize for Burn Center Tx

EMed discretion

**SUMMARY - 95 NOTIFICATION**  
Mechanism based. No significant anatomic injury.

**EXCEPTIONS:** - Extremity fracture distal to knee or elbow  
- Abrasions, lacerations or contusions

**CRITERIA**

Rollover, unrestrained

Death of occupant of car

Prolonged extrication

Auto deformity >20 inches or intrusion to space occupied by passenger

Consider risk based on age >55 or <5 or known cardiac, respiratory, metabolic disease, or drug/alcohol influence.

Falls Adults <15 ft / Children <10 ft

EMed discretion

**B. Weights for kappa tests were as follows:**

Triage-Weighted:

|            | Other System<br>1 | Other System<br>2 | Other System<br>3 | Other System<br>4 |
|------------|-------------------|-------------------|-------------------|-------------------|
| Gold Std 1 | 1                 | 0.47              | 0                 | 0                 |
| Gold Std 2 | 0.23              | 1                 | 0.63              | 0                 |
| Gold Std 3 | 0                 | 0.42              | 1                 | 0.7               |
| Gold Std 4 | 0                 | 0                 | 0.53              | 1                 |

Expert-Weighted:

|            | Other System<br>1 | Other System<br>2 | Other System<br>3 | Other System<br>4 |
|------------|-------------------|-------------------|-------------------|-------------------|
| Gold Std 1 | 1                 | 0.4               | 0.2               | 0                 |
| Gold Std 2 | 0.9               | 1                 | 0.6               | 0.8               |
| Gold Std 3 | 0.6               | 0.8               | 1                 | 0.6               |
| Gold Std 4 | 0.6               | 0.8               | 0.9               | 1                 |

**C. Normalized distributions for OTT and ESI with Physician-Defined Acuity Triage Level:**

**Table 1a. Normalized distribution of OTT and Physician-Defined Acuity**

| <i>Gold Standard</i> | <i>OTT</i> |         |          |         | Total |
|----------------------|------------|---------|----------|---------|-------|
|                      | 1          | 2       | 3        | 4       |       |
| 1                    | 70         | 10      | 20       | 0       | 100   |
| 2                    | 7.2165     | 43.299  | 37.1134  | 12.3711 | 100   |
| 3                    | 2.2831     | 18.7215 | 65.7534  | 13.242  | 100   |
| 4                    | 2.1127     | 5.6338  | 54.9296  | 37.3239 | 100   |
| Total                | 81.6123    | 77.6542 | 177.7964 | 62.9371 | 400   |

**Table 2a. Normalized distribution of ESI and Physician-Define Acuity**

| <i>Gold Standard</i> | <i>ESI</i> |          |          |         | Total |
|----------------------|------------|----------|----------|---------|-------|
|                      | 1          | 2        | 3        | 4       |       |
| 1                    | 35         | 45       | 20       | 0       | 100   |
| 2                    | 1.0417     | 43.75    | 55.2083  | 0       | 100   |
| 3                    | 0.4608     | 10.5991  | 79.2627  | 9.6774  | 100   |
| 4                    | 0          | 2.8986   | 54.3478  | 42.7536 | 100   |
| Total                | 36.5025    | 102.2477 | 208.8188 | 52.431  | 400   |

**D.** Fleiss kappa was calculated according to the equation below where variables are as in Fleiss:

$$\kappa = \frac{\sum_{i=1}^N \sum_{j=1}^k n_{ij}^2 - Nn[1 + (n-1) \sum_{j=1}^k p_j^2]}{Nn(n-1)(1 - \sum_{j=1}^k p_j^2)}$$

$$\text{Var}(\kappa) = \frac{2}{Nn(n-1)} \times \frac{\sum_j p_j^2 - (2n-3)(\sum_j p_j^2)^2 + 2(n-2) \sum_j p_j^3}{(1 - \sum_j p_j^2)^2} \quad [16]$$

## E. One-Two-Triage is a two-stage triage system

### Stage 1

Stage 1 quickly separates out critical (red) and emergent (orange) patients using the following procedures:

1. Greet patient
2. Place pulse oximeter on their finger
3. Ask them what brings them to the hospital today
4. Use above information to triage according to the form below:

|                        |  |                                                     |  |
|------------------------|--|-----------------------------------------------------|--|
| Ministry of Health     |  | Hospital No. _____                                  |  |
| RN: _____              |  | Sex: _____ Date: ____/____/____ Time arrived: _____ |  |
| Name: _____ DOB: _____ |  | Address: _____                                      |  |

  

| STAGE 1 TRIAGE   |                                                                   |                          |       |
|------------------|-------------------------------------------------------------------|--------------------------|-------|
| Airway/Breathing | Cannot talk in complete sentences or obvious respiratory distress | <input type="checkbox"/> | SpO2% |
|                  | Central cyanosis                                                  | <input type="checkbox"/> |       |
|                  | SpO2 <90%                                                         | <input type="checkbox"/> |       |
| Circulation      | Pulse Rate <40 or >140 [adult]    <60 or >160 [pediatric]         | <input type="checkbox"/> |       |
|                  | Rapid Uncontrolled Bleeding                                       | <input type="checkbox"/> | PR    |
| Disability       | Responds only to Pain or Unresponsive                             | <input type="checkbox"/> |       |

If identified, **Triage Red** to Resuscitation

  

| Adult Priority Signs                                                                                                       |                          |                                                                                                                                                                       |                          |
|----------------------------------------------------------------------------------------------------------------------------|--------------------------|-----------------------------------------------------------------------------------------------------------------------------------------------------------------------|--------------------------|
| Heartrate >130                                                                                                             | <input type="checkbox"/> | Abdominal Pain: severe and worse with walking OR severe and pregnant                                                                                                  | <input type="checkbox"/> |
| GI Bleed, 1 of the following in last 12 hours:<br>Vomiting Blood   Bloody Stool   Coffee Ground Emesis   Black Tarry Stool | <input type="checkbox"/> | Trauma: not isolated to extremity                                                                                                                                     | <input type="checkbox"/> |
| Burns on face or large area                                                                                                | <input type="checkbox"/> | Femur Deformity                                                                                                                                                       | <input type="checkbox"/> |
| Chest Pain onset <12hr AND age >50                                                                                         | <input type="checkbox"/> | Urticaria with difficulty breathing                                                                                                                                   | <input type="checkbox"/> |
| Fever with neck pain OR altered mental status                                                                              | <input type="checkbox"/> | Violent OR Agitated                                                                                                                                                   | <input type="checkbox"/> |
| Headache: sudden AND severe                                                                                                | <input type="checkbox"/> | Eye Emergency: chemical splash                                                                                                                                        | <input type="checkbox"/> |
| Difficulty Talking or Localized Motor Weakness: in last 12 hours AND ongoing                                               | <input type="checkbox"/> |                                                                                                                                                                       | <input type="checkbox"/> |
| Cold and Pulseless Limb                                                                                                    | <input type="checkbox"/> | Pregnant [visibly or delivery in past 6 weeks] AND 1 of following: Vaginal Bleeding   Fever   History of Recent Seizure   Headache   Blurred Vision   Suspected Labor | <input type="checkbox"/> |
| Poisoning or Overdose                                                                                                      | <input type="checkbox"/> |                                                                                                                                                                       | <input type="checkbox"/> |
| Snakebite with Swelling                                                                                                    | <input type="checkbox"/> |                                                                                                                                                                       | <input type="checkbox"/> |

  

| Pediatric Priority Signs                      |                          |                                     |                          |
|-----------------------------------------------|--------------------------|-------------------------------------|--------------------------|
| Age <3 months OR <1 year and not able to feed | <input type="checkbox"/> | Severe wasting                      | <input type="checkbox"/> |
| Fever with change in behavior                 | <input type="checkbox"/> | Both leg edema                      | <input type="checkbox"/> |
| Trauma                                        | <input type="checkbox"/> | Burns                               | <input type="checkbox"/> |
| Severe pallor                                 | <input type="checkbox"/> | Urticaria with difficulty breathing | <input type="checkbox"/> |
| Poisoning: History or Suspicion of Ingestion  | <input type="checkbox"/> | Abdominal pain: unwilling to walk   | <input type="checkbox"/> |
| Obvious distress due to pain                  | <input type="checkbox"/> | Snakebite                           | <input type="checkbox"/> |
| Cold or Pulseless Limb                        | <input type="checkbox"/> | Eye emergency: chemical splash      | <input type="checkbox"/> |
| Lethargy                                      | <input type="checkbox"/> | Femur deformity                     | <input type="checkbox"/> |

If identified, **Triage Orange** to ER

If the patient does not meet criteria above, proceed to stage 2. Registration of the patient may occur between these two stages.

### Stage 2

Stage 2 separates patients into urgent (yellow) or non-urgent (green) based on chief complaint and vital signs.

1. Complete a set of vital signs, if any “danger vital signs” are identified as below, the patient s triaged orange
2. Use the patient’s chief complaint to identify into which physiological system the problem falls
3. Turn to that system in the stage 2 booklet
4. Ask the set of binary questions related to that system as below
5. If the answer to any question is “yes” the patient s triaged yellow; if the answer to all questions is no, the patient s triaged green

**មនុស្សធម៌ ( ភ្នែក )**  
Adult (Eye)

| ប្រភេទ              | Eye                              | Yes     |
|---------------------|----------------------------------|---------|
| សិប្បកន្ត្រៃ        | Unilateral painful eye           | បាទ/ចាស |
| មានរលកច្រើន         | Purulent discharge, large volume | បាទ/ចាស |
| ស្ថិតិលស្រទាប់ភ្នែក | Pain with eye movement           | បាទ/ចាស |
| ស្ថិតិលស្រទាប់ភ្នែក | Proptosis                        | បាទ/ចាស |

ប្រសិនបើប្រាប់សំណួរទាំងនេះ មានច្រើនជាង 19 មានន័យថាមានបញ្ហាសុខភាពដំបូង

**មនុស្សធម៌ ( ត្រចៀក ប្រដុះ បំពង់ )**  
Adult (Ears, Nose, Throat)

| ប្រភេទ                 | Ears, Nose, Throat       | Yes     |
|------------------------|--------------------------|---------|
| មិនអាចយល់ឃើញទឹកមាត់    | Cannot swallow, drooling | បាទ/ចាស |
| សើច្រាមក្រោមមាត់       | Swelling under mandible  | បាទ/ចាស |
| ផ្លូវសម្លេងផ្លាស់ប្តូរ | Change in voice [hoarse] | បាទ/ចាស |
| មាត់រលាក               | Face swollen             | បាទ/ចាស |
| បាត់ស្រទាប់ដង្ហើម      | Shortness of Breath      | បាទ/ចាស |
| បាត់ស្រទាប់លំដាប់      | Loss of balance          | បាទ/ចាស |

ប្រសិនបើប្រាប់សំណួរទាំងនេះ មានច្រើនជាង 7 មានន័យថាមានបញ្ហាសុខភាពដំបូង

**មនុស្សធម៌ ( ប្រព័ន្ធប្រសាសន )**  
Adult (Neurological)

| ប្រព័ន្ធប្រសាសន                             | Neurological                                              | Yes     |
|---------------------------------------------|-----------------------------------------------------------|---------|
| ទំនាស់ភ្នែកមួយភ្លែត                         | Localized weakness >12 hours ago OR resolved              | បាទ/ចាស |
| និយាយបានតែពាក្យសំខាន់ៗ                      | Speaking but doesn't make sense >12 hours ago OR resolved | បាទ/ចាស |
| ប្រកាសចងចាំ ឬ ប្រើចងចាំរយៈពេល ៥ ឬ ច្រើនថ្ងៃ | 5 or more seizures in the last 24 hours                   | បាទ/ចាស |
| ប្រកាសលើកទឹកស្រទាប់ស្រទាប់                  | First seizure within 1 week                               | បាទ/ចាស |
| មិនអាចដើរបាន                                | Unable to walk, recently                                  | បាទ/ចាស |
| បាត់ស្រទាប់លំដាប់                           | Loss of balance                                           | បាទ/ចាស |
| ស្ថិតិលស្រទាប់ដោយមានភ្នែក                   | Headache with fever                                       | បាទ/ចាស |
| មានប្រសិទ្ធភាពស្រទាប់                       | Recent history of syncope                                 | បាទ/ចាស |

ប្រសិនបើប្រាប់សំណួរទាំងនេះ មានច្រើនជាង 19 មានន័យថាមានបញ្ហាសុខភាពដំបូង

**មនុស្សធម៌ ( ប្រព័ន្ធប្រសាសន )**  
Adult (Cardiothoracic)

| ប្រព័ន្ធប្រសាសន          | Cardiothoracic                               | Yes     |
|--------------------------|----------------------------------------------|---------|
| កំដៅ $\geq 38$ C         | Temperature $\geq 38$ C                      | បាទ/ចាស |
| សិប្បកន្ត្រៃ             | Chest pain                                   | បាទ/ចាស |
| បាត់ស្រទាប់ដង្ហើម        | Shortness of breath                          | បាទ/ចាស |
| បាត់ស្រទាប់ដង្ហើម ពេលដើរ | Shortness of breath when walking 3-10 meters | បាទ/ចាស |
| មានប្រសិទ្ធភាពស្រទាប់    | Recent history of syncope                    | បាទ/ចាស |
| សើច្រាមក្រោមមាត់         | New lower extremity edema                    | បាទ/ចាស |

ប្រសិនបើប្រាប់សំណួរទាំងនេះ មានច្រើនជាង 19 មានន័យថាមានបញ្ហាសុខភាពដំបូង

**មនុស្សធម៌ ( ត្រពះ ពោះ ភ្នែក )**  
Adult (Gastrointestinal)

ប្រសិនបើប្រាប់សំណួរទាំងនេះ មានច្រើនជាង ៧ មានន័យថាមានបញ្ហាសុខភាពដំបូង

| សរីរកោស                               | Abdominal Pain                   | Yes     |
|---------------------------------------|----------------------------------|---------|
| កំដៅ $\geq 38$ C                      | Temperature $\geq 38$ C          | បាទ/ចាស |
| សើច្រាមក្រោមមាត់                      | Constant pain                    | បាទ/ចាស |
| សើច្រាមក្រោមមាត់ ពេលដើរ               | Pain worse with walking          | បាទ/ចាស |
| សើច្រាមក្រោមមាត់ ធ្ងន់                | Severe pain                      | បាទ/ចាស |
| អាយុ $\geq 50$                        | Age $\geq 50$                    | បាទ/ចាស |
| មានផ្ទៃពោះ (សើច្រាមក្រោមមាត់ ឬ មធ្យម) | Pregnant (mild or moderate pain) | បាទ/ចាស |
| ពោះភ្លើង                              | New distention                   | បាទ/ចាស |
| ភ្លើងស្រទាប់                          | Jaundice                         | បាទ/ចាស |
| មានប្រសិទ្ធភាពស្រទាប់                 | History of Diabetes              | បាទ/ចាស |
| មានផ្ទៃពោះ (សើច្រាមក្រោមមាត់ ឬ មធ្យម) | Pregnant (Mild or moderate pain) | បាទ/ចាស |

  

| ត្រពះ ពោះ                    | Vomiting/Diarrhea            | Yes     |
|------------------------------|------------------------------|---------|
| កំដៅ $\geq 38$ C             | Temperature $\geq 38$ C      | បាទ/ចាស |
| កាកស្រទាប់ តិចតួច ២ ដល់ ៥ ដង | Loose stools $\geq 24$ hours | បាទ/ចាស |
| តិចតួច ២ ដល់ ៥ ដង            | Vomiting $\geq 12$ hours     | បាទ/ចាស |

ប្រសិនបើប្រាប់សំណួរទាំងនេះ មានច្រើនជាង 19 មានន័យថាមានបញ្ហាសុខភាពដំបូង

ប្រសិនបើប្រាប់សំណួរទាំងនេះ មានច្រើនជាង 19 មានន័យថាមានបញ្ហាសុខភាពដំបូង

**មនុស្សធម៌ ( ប្រព័ន្ធប្រសាសន )**  
Adult (Genitourinary)

| ប្រព័ន្ធប្រសាសន          | Genitourinary Male                   | Yes     |
|--------------------------|--------------------------------------|---------|
| កំដៅ $\geq 38$ C         | Temperature $\geq 38$ C              | បាទ/ចាស |
| កាត់បន្ថយទឹកនោម          | Decreased urine or unable to urinate | បាទ/ចាស |
| នោមមានឈាម                | Hematuria                            | បាទ/ចាស |
| សើច្រាមក្រោមមាត់         | Testicle pain                        | បាទ/ចាស |
| មានស្នាមសើច្រាមក្រោមមាត់ | Penile lesion                        | បាទ/ចាស |
| សើច្រាមក្រោមមាត់         | Scrotal redness                      | បាទ/ចាស |
| ប្រព័ន្ធប្រសាសន រលាក     | Erection continuous                  | បាទ/ចាស |
| សើច្រាមក្រោមមាត់         | Severe flank pain                    | បាទ/ចាស |

  

| ប្រព័ន្ធប្រសាសន          | Genitourinary Female                  | Yes     |
|--------------------------|---------------------------------------|---------|
| កំដៅ $\geq 38$ C         | Temperature $\geq 38$ C               | បាទ/ចាស |
| កាត់បន្ថយទឹកនោម          | Decreased urine or unable to urinate  | បាទ/ចាស |
| នោមមានឈាម                | Vaginal Discharge with abdominal pain | បាទ/ចាស |
| មានស្នាមសើច្រាមក្រោមមាត់ | Abnormal vaginal bleeding             | បាទ/ចាស |
| បាត់ស្រទាប់ដង្ហើម        | Missed period with abdominal pain     | បាទ/ចាស |
| នោមមានឈាម                | Hematuria                             | បាទ/ចាស |
| សើច្រាមក្រោមមាត់         | Severe flank pain                     | បាទ/ចាស |

ប្រសិនបើប្រាប់សំណួរទាំងនេះ មានច្រើនជាង 19 មានន័យថាមានបញ្ហាសុខភាពដំបូង

**វេជ្ជសាស្ត្រ (ប្រព័ន្ធពីធានាសាច់ដុំ)**  
**Adult (Musculoskeletal)**

| ស្ថានភាពដាច់ខាត                                       | Extremely                                                   | Yes     |
|-------------------------------------------------------|-------------------------------------------------------------|---------|
| រងរបួសដាច់ខាតប្រវែង $\geq 2$ ស.ម ឬ ជម្រៅ $\geq 2$ ស.ម | Large laceration ( $\geq 2$ cm length or $\geq 2$ cm depth) | បាទ/ចាស |
| ទ្រង់ទ្រាយកាត់ពេញទៅលើស្បែក                            | New deformity/impaction                                     | បាទ/ចាស |
| របួសកង្វែងដោយមានរាងកាយខូច                             | Dirty wound with fever                                      | បាទ/ចាស |
| ស្ថិតិសង្វាក់ដោយមានរាងកាយខូច                          | Joint pain warm to touch                                    | បាទ/ចាស |
| ស្ថិតិសង្វាក់ដោយមានរាងកាយខូច                          | Swollen extremity                                           | បាទ/ចាស |
| រោគសញ្ញាជំងឺប្រូស                                     | Cellulitis or abscess                                       | បាទ/ចាស |
| គឺជាសញ្ញាជំងឺប្រូស                                    | Bony tenderness after trauma                                | បាទ/ចាស |

| ស្ថានភាពដាច់ខាត                     | Back (ឈាត់)                               | Yes     |
|-------------------------------------|-------------------------------------------|---------|
| គ្រុឌក្រហម $\geq 38$ C              | Fever $\geq 38$ C                         | បាទ/ចាស |
| ស្ថិតិសង្វាក់ដោយមានរាងកាយខូចដាច់ខាត | Back pain with incontinence               | បាទ/ចាស |
| ស្ថិតិសង្វាក់ដោយមានរាងកាយខូចដាច់ខាត | Back pain with lower extremity weakness   | បាទ/ចាស |
| ស្ថិតិសង្វាក់ដោយមានរាងកាយខូចដាច់ខាត | Back pain with numbness in groin/perineum | បាទ/ចាស |
| ស្ថិតិសង្វាក់ដោយមានរាងកាយខូចដាច់ខាត | Back pain with urine retention            | បាទ/ចាស |
| គឺជាសញ្ញាជំងឺប្រូស                  | Bony tenderness after trauma              | បាទ/ចាស |

ប្រសិនបើប្រព័ន្ធពីធានាសាច់ដុំមានលក្ខណៈ 19\* មានលក្ខណៈសង្គ្រោះជំងឺ 100 ប្រាំមួយ

**វេជ្ជសាស្ត្រ (ស្បែក និងជាស្ថិតិសង្វាក់)**  
**Adult (Skin and Soft Tissue)**

| ស្ថានភាពដាច់ខាត                                       | Skin and Soft Tissue                                        | Yes     |
|-------------------------------------------------------|-------------------------------------------------------------|---------|
| ក្រហមប្រកាសដោយមានរាងកាយខូចដាច់ខាត                     | Ulcerate with difficulty breathing                          | បាទ/ចាស |
| រោគសញ្ញា                                              | Burns                                                       | បាទ/ចាស |
| សត្វចិញ្ចឹម                                           | Animal bites                                                | បាទ/ចាស |
| រងរបួសដាច់ខាតប្រវែង $\geq 6$ ស.ម ឬ ជម្រៅ $\geq 2$ ស.ម | Large laceration ( $\geq 6$ cm length or $\geq 2$ cm depth) | បាទ/ចាស |
| មានរោគសញ្ញាជំងឺប្រូស                                  | Oral lesions with rash                                      | បាទ/ចាស |
| គ្រុឌក្រហម                                            | Fever                                                       | បាទ/ចាស |
| ប្រព័ន្ធពីធានាសាច់ដុំ                                 | History of Diabetes                                         | បាទ/ចាស |
| រោគសញ្ញាជំងឺប្រូស                                     | Cellulitis or abscess                                       | បាទ/ចាស |

ប្រសិនបើប្រព័ន្ធពីធានាសាច់ដុំមានលក្ខណៈ 19\* មានលក្ខណៈសង្គ្រោះជំងឺ 100 ប្រាំមួយ

**វេជ្ជសាស្ត្រ (អាវុធាវុធ)**  
**Adult (Toxic)**

| ស្ថានភាពដាច់ខាត                  | Toxic                              | Yes     |
|----------------------------------|------------------------------------|---------|
| បេបប្រូសបង្កើតឡើង                | Ingestion in past 12 hrs           | បាទ/ចាស |
| បេបប្រូស Paracetamol             | Ingestion of Paracetamol           | បាទ/ចាស |
| ផ្ទុកស្រាវកាលីទ្រដោយមានរាងកាយខូច | Daily alcohol drinker with tremor? | បាទ/ចាស |

ប្រសិនបើប្រព័ន្ធពីធានាសាច់ដុំមានលក្ខណៈ 19\* មានលក្ខណៈសង្គ្រោះជំងឺ 100 ប្រាំមួយ

**Adult Danger Vital Signs**

|                                                                    |                                                                       |         |
|--------------------------------------------------------------------|-----------------------------------------------------------------------|---------|
| សម្ពាធឈាមអតិបរមា $\geq 180$ ឬ<br>សម្ពាធឈាមអប្បបរមា $\geq 100$ mmHg | Systolic Blood Pressure $\geq 180$<br>or Diastolic BP $\geq 100$ mmHg | បាទ/ចាស |
| ចង្វាក់បេះដូង $\geq 130$ ឬ $\leq 50$                               | Heart Rate $\geq 130$ or $\leq 50$                                    | បាទ/ចាស |
| ចង្វាក់ដង្ហើម $\geq 28$                                            | Respiratory Rate $\geq 28$                                            | បាទ/ចាស |
| សម្ពាធឈាមអតិបរមា $\leq 90$                                         | Systolic Blood Pressure $\leq 90$                                     | បាទ/ចាស |

**កុមារ ( ភ្នែក )**  
Pediatric Eye

| រោគសញ្ញា                           | Eye                              | Yes     |
|------------------------------------|----------------------------------|---------|
| ភ្នែកឆ្មា                          | Unilateral painful eye           | បាទ/ចាស |
| ភ្នែកក្រហម                         | Red eyes                         | បាទ/ចាស |
| ផ្លាស់ប្តូរទិសភ្នែកយ៉ាងខ្លាំងក្លាយ | Change in vision in last 24 hrs  | បាទ/ចាស |
| ហៀរច្រើន                           | Purulent discharge, large volume | បាទ/ចាស |
| ហើមជុំវិញភ្នែក                     | Peri-orbital swelling            | បាទ/ចាស |
| ភ្នែកច្របូកច្របល់                  | Pain with eye movement           | បាទ/ចាស |
| លៀងភ្នែក                           | Proptosis                        | បាទ/ចាស |

ប្រសិនបើក្រុមគ្រូពេទ្យសង្កេតឃើញថា "19" មានសញ្ញាណកម្មបុព្វបទដល់ "បែន"។

**កុមារ ( ម្លើត ប្រដុះ និង ម៉ែតត )**  
Pediatric Ears, Nose and Throat

| ប្រសញ្ញា ប្រដុះ ម៉ែតត   | Ears, Nose, Throat            | Yes     |
|-------------------------|-------------------------------|---------|
| ស្រែកខ្លាំង             | Severe throat pain            | បាទ/ចាស |
| ហើមខាងក្រោមភ្នែក        | Swelling under mandible       | បាទ/ចាស |
| ផ្លាស់ប្តូរសំឡេង        | Change in voice               | បាទ/ចាស |
| ហៀរស្អុយខ្លាំង          | Foul smelling nasal discharge | បាទ/ចាស |
| ហើមមុខ                  | Face swollen                  | បាទ/ចាស |
| មិនអាចលេប/ហៀរទឹកអាត់    | Cannot swallow/drooling       | បាទ/ចាស |
| អាចសរសេរ/ក្រោយដំ        | Stridor                       | បាទ/ចាស |
| ហត់ ( ជក់ជូនភ្លើង )     | SOB                           | បាទ/ចាស |
| ឆ្អែក/ក្រហមជុំវិញប្រដុះ | Redness around ear            | បាទ/ចាស |
| ពិបាកកិច្ចការ           | Difficulty moving neck        | បាទ/ចាស |

ប្រសិនបើក្រុមគ្រូពេទ្យសង្កេតឃើញថា "19" មានសញ្ញាណកម្មបុព្វបទដល់ "បែន"។

**កុមារ ( ប្រព័ន្ធប្រសាសន )**  
Pediatric Neurological

| ប្រសញ្ញាប្រសាសន          | Neurological                          | Yes     |
|--------------------------|---------------------------------------|---------|
| ស្នែកឆ្មា                | Severe headache                       | បាទ/ចាស |
| ចាត់ចែងខ្លាំង            | New motor weakness                    | បាទ/ចាស |
| និយាយតែស្តាប់មិនយល់      | Speaking but words don't make sense   | បាទ/ចាស |
| ប្រការប៉ះ ឬប្រើដៃខ្លាំង  | 2 or more seizures in the last 24 hrs | បាទ/ចាស |
| ច្របូកច្របល់             | Syncope or near syncope               | បាទ/ចាស |
| ប្រការប៉ះដំបូង           | First seizure                         | បាទ/ចាស |
| និយាយមិនបាន              | Difficulty or unable to talk          | បាទ/ចាស |
| សីតុណ្ហភាព និងកម្រិត 38C | Headache and Temperature >38 C        | បាទ/ចាស |

ប្រសិនបើក្រុមគ្រូពេទ្យសង្កេតឃើញថា "19" មានសញ្ញាណកម្មបុព្វបទដល់ "បែន"។

**កុមារ ( ទ្រូង និង បេះដូង )**  
Pediatric Cardiothoracic

| រោគសញ្ញា                  | Cardiothoracic                | Yes     |
|---------------------------|-------------------------------|---------|
| ចង្វាក់ដង្ហើមខ្លាំង       | RR >40                        | បាទ/ចាស |
| ហត់ ( ជក់ជូនភ្លើង )       | Short of breath               | បាទ/ចាស |
| ហត់លឿនជាងធម្មតា           | Short of breath with exertion | បាទ/ចាស |
| អាចសរសេរ/ក្រោយដំ          | Stridor                       | បាទ/ចាស |
| ក្តៅ                      | Fever                         | បាទ/ចាស |
| ចង្វាក់ដង្ហើមលឿនជាងធម្មតា | Tachycardia without fever     | បាទ/ចាស |
| ច្របូកច្របល់              | Syncope or near syncope       | បាទ/ចាស |
| ក្រហម/ស្បែក               | Productive Cough              | បាទ/ចាស |
| ក្អក ក្អយ រយៈពេល          | Cough >2 weeks                | បាទ/ចាស |

ប្រសិនបើក្រុមគ្រូពេទ្យសង្កេតឃើញថា "19" មានសញ្ញាណកម្មបុព្វបទដល់ "បែន"។

**កុមារ ( ត្រពះ ពោះវៀន )**  
Pediatric (Gastrointestinal)

ប្រសិនបើក្រុមគ្រូពេទ្យសង្កេតឃើញថា "19" មានសញ្ញាណកម្មបុព្វបទដល់ "បែន"។

| រោគសញ្ញា    | Abdominal Pain           | Yes     |
|-------------|--------------------------|---------|
| កម្រិត 38   | Temperature >38          | បាទ/ចាស |
| ស្រែកខ្លាំង | Pain worse with walking  | បាទ/ចាស |
| ស្រែកខ្លាំង | Severe pain              | បាទ/ចាស |
| ស្រែកខ្លាំង | Severe intermittent pain | បាទ/ចាស |
| ស្រែកខ្លាំង | Jaundice                 | បាទ/ចាស |
| ស្រែកខ្លាំង | Purpura                  | បាទ/ចាស |
| ឈាម         | Distention               | បាទ/ចាស |
| ឈាម         | History of DM            | បាទ/ចាស |

| ប្រសញ្ញា       | Vomiting/Diarrhea      | Yes     |
|----------------|------------------------|---------|
| កម្រិត 38      | Temperature >38        | បាទ/ចាស |
| ឈាម            | Bloody stool           | បាទ/ចាស |
| កម្រិត 24 ម៉ោង | Loose stools >24hrs    | បាទ/ចាស |
| ឈាម            | Black stools           | បាទ/ចាស |
| ឈាម            | Vomiting blood or bile | បាទ/ចាស |
| ឈាម            | Vomiting >12 hours     | បាទ/ចាស |
| ឈាម            | History of DM          | បាទ/ចាស |

ប្រសិនបើក្រុមគ្រូពេទ្យសង្កេតឃើញថា "19" មានសញ្ញាណកម្មបុព្វបទដល់ "បែន"។

**កុមារ ( ក្តៅ )**  
Pediatric (Fever)

| រោគសញ្ញា            | Fever                      | Yes     |
|---------------------|----------------------------|---------|
| អាយុ 1 ឆ្នាំ        | Age <1 year old            | បាទ/ចាស |
| ស្រែកខ្លាំង         | Headache or neck pain      | បាទ/ចាស |
| ប្រាកដថាប្រាកដ      | Altered mental status      | បាទ/ចាស |
| អាចផ្ទុះ            | Pregnant                   | បាទ/ចាស |
| ងាយស្រួល            | Easy Bruising              | បាទ/ចាស |
| ប្រហុយ              | Bleeding from nose or gums | បាទ/ចាស |
| ហត់ ( ជក់ជូនភ្លើង ) | Shortness of breath        | បាទ/ចាស |
| ក្រហម               | Abdominal Pain             | បាទ/ចាស |
| ឈាម                 | History of DM              | បាទ/ចាស |

ប្រសិនបើក្រុមគ្រូពេទ្យសង្កេតឃើញថា "19" មានសញ្ញាណកម្មបុព្វបទដល់ "បែន"។

**កុមារ ( ប្រព័ន្ធប្រសាសន និង បន្ទាញ )**  
Pediatric (Genitourinary)

| ប្រសញ្ញាប្រសាសន និង បន្ទាញ | Genitourinary Male                   | Yes     |
|----------------------------|--------------------------------------|---------|
| បន្ទាញ តិចជាងធម្មតា        | Decreased urine or unable to urinate | បាទ/ចាស |
| ឈាម                        | Hematuria                            | បាទ/ចាស |
| ស្រែកខ្លាំង                | Testicle pain                        | បាទ/ចាស |
| ឈាម                        | Purulent discharge                   | បាទ/ចាស |
| ឈាម                        | Purulent lesion                      | បាទ/ចាស |
| ឈាម                        | Scrotal redness                      | បាទ/ចាស |
| ស្រែកខ្លាំង                | Red or swollen penis                 | បាទ/ចាស |
| ប្រហុយ                     | Erection continuous                  | បាទ/ចាស |
| ស្រែកខ្លាំង                | Flank pain                           | បាទ/ចាស |
| កម្រិត 38 c                | Temperature >38 c                    | បាទ/ចាស |

| ប្រសញ្ញាប្រសាសន និង បន្ទាញ | Female Genitourinary                  | Yes     |
|----------------------------|---------------------------------------|---------|
| បន្ទាញ តិចជាងធម្មតា        | Decreased urine or unable to urinate  | បាទ/ចាស |
| ឈាម                        | Vaginal discharge with abdominal pain | បាទ/ចាស |
| ឈាម                        | Foul smelling discharge               | បាទ/ចាស |
| ឈាម                        | Abnormal vaginal bleeding             | បាទ/ចាស |
| ឈាម                        | Massed period with abdominal pain     | បាទ/ចាស |
| ឈាម                        | Foul smelling discharge               | បាទ/ចាស |
| ឈាម                        | Hematuria                             | បាទ/ចាស |

ប្រសិនបើក្រុមគ្រូពេទ្យសង្កេតឃើញថា "19" មានសញ្ញាណកម្មបុព្វបទដល់ "បែន"។

**កុមារ ( ស្បែក និង ជាលិកា )**  
Pediatric (Skin and Soft Tissue)

| រោគសញ្ញា | Skin Soft Tissue                                  | Yes     |
|----------|---------------------------------------------------|---------|
| ឈាម      | Blisters                                          | បាទ/ចាស |
| ឈាម      | Furuncles                                         | បាទ/ចាស |
| ឈាម      | Purpura                                           | បាទ/ចាស |
| ឈាម      | Peeling skin                                      | បាទ/ចាស |
| ឈាម      | Sites                                             | បាទ/ចាស |
| ឈាម      | Oral lesion                                       | បាទ/ចាស |
| ឈាម      | Fever                                             | បាទ/ចាស |
| ឈាម      | Red, tender skin                                  | បាទ/ចាស |
| ឈាម      | Large laceration (>6cm length or >2cm depth loc.) | បាទ/ចាស |

ប្រសិនបើក្រុមគ្រូពេទ្យសង្កេតឃើញថា "19" មានសញ្ញាណកម្មបុព្វបទដល់ "បែន"។

**កុមារ ( ប្រព័ន្ធប្រសាសន និង សាស្ត្រ )**  
Pediatric (Musculoskeletal)

| រោគសញ្ញា | Extremity                                         | Yes     |
|----------|---------------------------------------------------|---------|
| ឈាម      | Fracture or bony tenderness                       | បាទ/ចាស |
| ឈាម      | New deformity                                     | បាទ/ចាស |
| ឈាម      | Wont walk                                         | បាទ/ចាស |
| ឈាម      | Limp                                              | បាទ/ចាស |
| ឈាម      | Large laceration (>6cm length or >2cm depth loc.) | បាទ/ចាស |
| ឈាម      | Dirty wound with fever                            | បាទ/ចាស |
| ឈាម      | Joint pain with warm                              | បាទ/ចាស |
| ឈាម      | Swollen extremity                                 | បាទ/ចាស |
| ឈាម      | Red tender skin                                   | បាទ/ចាស |
| ឈាម      | Back Pain                                         | បាទ/ចាស |

ប្រសិនបើក្រុមគ្រូពេទ្យសង្កេតឃើញថា "19" មានសញ្ញាណកម្មបុព្វបទដល់ "បែន"។



# សញ្ញាជីវិតគ្រោះថ្នាក់សម្រាប់កុមារ

## Pediatric Danger Vital Signs

| អាយុ<br>Age           | បន្ទាប់បេះដូង<br>Heart Rate | សម្ព័ន្ធលឈាមអតិបរិមាណ<br>Systolic Blood Pressure | Yes     |
|-----------------------|-----------------------------|--------------------------------------------------|---------|
| ≤ 3ខែ                 | ≥ 180                       | ≤ 70                                             | បាទ/ចាស |
| ៣ខែទៅ៣ឆ្នាំ (3m-3y)   | ≥ 160                       | ≤ 80                                             | បាទ/ចាស |
| ៣ឆ្នាំទៅ៨ឆ្នាំ (3-8y) | ≥ 140                       | ≤ 90                                             | បាទ/ចាស |
| ≥ 8ឆ្នាំ              | ≥ 120                       | ≤ 90                                             | បាទ/ចាស |

### **E. Disagreement scoring system:**

For under-triaging:

Physician level 1 and OTT level 4= 10 points

Physician level 1 and OTT level 3= 8 points

Physician level 2 and OTT level 4= 8 points

Physician level 1 and OTT level 2= 4 points

Physician level 2 and OTT level 3= 4 points

Physician level 3 and OTT level 4= 4 points

For over-triaging:

Physician level 4 and OTT level 1= 3 points

Physician level 3 and OTT level 1= 2 points

Physician level 4 and OTT level 2= 2 points

Physician level 2 and OTT level 1= 1 points

Physician level 3 and OTT level 2= 1 points

Physician level 4 and OTT level 3= 1 points
